# Supplementary material
Source: PubMed Central journal article supplement (PMC4933466)
Supplement: 10.1074_M115.711325_jbc.M115.711325-1.pdf [file 10.1074_M115.711325_jbc.M115.711325-1.pdf]

Structural analysis of a complex between small ubiquitin-like modifier 1 (SUMO1) and the ZZ domain of CREB-binding protein (CBP/p300) reveals a new interaction surface on SUMO

Carl Diehl, Mikael Akke, Simon Bekker-Jensen, Niels Mailand, Werner Streicher, and Mats Wikström

**SUPPLEMENTAL TABLE 1.** Parameters from the fitting of the  $^{15}\text{N}$  CPMG relaxation dispersion curves of apo-SUMO1, SIMPX-SUMO1, and ZZ domain-SUMO1 respectively. The fitted parameters shown are the exchange rate  $k_{\text{ex}}$ , the population of the major state  $p_{\text{M}}$ , the difference in chemical shift between major and minor state  $\Delta\Omega_{15\text{N}}$ ,  $R_{2,0}$  in the absence of exchange at 60.8 and 80.1 MHz and the F-test probability  $p$  for distinguishing between the models in Equation 1.

**apo-SUMO1**

| Residue | $k_{\text{ex}}$ ( $\text{s}^{-1}$ ) | $\pm$ std | $p_{\text{M}}$ | $\pm$ std | $\Delta\Omega_{15\text{N}}$ (ppm) | $\pm$ std | $R_{2,0}$<br>60MHz<br>( $\text{s}^{-1}$ ) | $\pm$ std | $R_{2,0}$<br>80MHz<br>( $\text{s}^{-1}$ ) | $\pm$ std | $p$     |
|---------|-------------------------------------|-----------|----------------|-----------|-----------------------------------|-----------|-------------------------------------------|-----------|-------------------------------------------|-----------|---------|
| 2       | 49725.8                             | 2225.0    | 0.998          | 0.002     | 2.288                             | 1.617     | 21.88                                     | 0.12      | 24.78                                     | 0.19      | 0.98    |
| 3       | 11459.5                             | 9090.6    | 0.991          | 0.006     | 1.251                             | 0.365     | 8.33                                      | 0.22      | 10.38                                     | 0.36      | 0.77    |
| 4       | 12689.1                             | 6618.7    | 0.989          | 0.005     | 1.306                             | 0.400     | 6.74                                      | 0.28      | 9.14                                      | 0.40      | 0.8     |
| 5       | 9124.5                              | 4868.6    | 0.988          | 0.007     | 0.881                             | 0.229     | 5.93                                      | 0.26      | 8.14                                      | 0.30      | 0.62    |
| 6       | 1772.6                              | 23698.5   | 0.999          | 0.003     | 0.314                             | 0.407     | 5.76                                      | 0.09      | 7.75                                      | 0.14      | 0.95    |
| 7       | 1216.6                              | 3447.6    | 0.992          | 0.022     | 0.401                             | 0.239     | 6.32                                      | 0.24      | 8.30                                      | 0.37      | 0.0083  |
| 9       | 16261.7                             | 11769.8   | 0.991          | 0.009     | 1.097                             | 0.498     | 12.05                                     | 0.32      | 15.19                                     | 0.47      | 1.0     |
| 10      | 10327.0                             | 8380.4    | 0.991          | 0.007     | 1.094                             | 0.436     | 14.57                                     | 0.41      | 18.24                                     | 0.60      | 0.91    |
| 11      | 11713.8                             | 1259.2    | 0.995          | 0.001     | 0.849                             | 0.125     | 2.40                                      | 0.03      | 2.45                                      | 0.04      | 0.96    |
| 13      | 2029.6                              | 6188.2    | 0.993          | 0.014     | 0.821                             | 0.480     | 9.74                                      | 0.18      | 12.20                                     | 0.44      | 1.6E-5  |
| 14      | 8857.9                              | 3827.1    | 0.990          | 0.003     | 1.540                             | 0.248     | 9.24                                      | 0.26      | 11.78                                     | 0.41      | 0.031   |
| 15      | 4014.2                              | 9200.7    | 0.989          | 0.016     | 1.022                             | 0.691     | 13.55                                     | 0.28      | 17.04                                     | 0.73      | 0.0027  |
| 16      | 1384.1                              | 2648.0    | 0.987          | 0.026     | 1.235                             | 0.498     | 18.08                                     | 0.81      | 24.76                                     | 1.48      | 5.1E-13 |
| 18      | 1877.3                              | 4957.3    | 0.995          | 0.011     | 1.120                             | 0.626     | 15.26                                     | 0.29      | 18.51                                     | 0.52      | 3.6E-6  |
| 19      | 3948.0                              | 7469.4    | 0.991          | 0.010     | 1.427                             | 0.703     | 16.57                                     | 0.35      | 19.68                                     | 0.79      | 0.002   |
| 20      | 612.9                               | 981.3     | 0.991          | 0.011     | 0.696                             | 0.326     | 19.91                                     | 0.24      | 21.49                                     | 0.41      | 7.4E-6  |
| 21      | 2906.5                              | 5790.4    | 0.993          | 0.006     | 2.852                             | 1.557     | 22.97                                     | 0.98      | 27.56                                     | 1.94      | 1.6E-9  |
| 22      | 11771.9                             | 7066.8    | 0.955          | 0.013     | 4.149                             | 0.526     | 18.95                                     | 2.50      | 16.56                                     | 4.38      | 3.1E-8  |
| 23      | 8095.4                              | 6465.0    | 0.994          | 0.003     | 4.970                             | 1.065     | 22.58                                     | 0.91      | 24.48                                     | 1.53      | 0.0033  |
| 24      | 977.6                               | 2340.4    | 0.994          | 0.004     | 2.415                             | 1.239     | 25.09                                     | 0.76      | 28.75                                     | 1.24      | 4.7E-6  |

|    |         |        |       |       |       |       |       |      |       |      |         |
|----|---------|--------|-------|-------|-------|-------|-------|------|-------|------|---------|
| 25 | 2400.6  | 4719.1 | 0.992 | 0.008 | 2.159 | 1.138 | 24.52 | 0.74 | 27.34 | 1.41 | 6.0E-09 |
| 26 | 10721.4 | 6408.8 | 0.986 | 0.005 | 4.112 | 0.754 | 22.32 | 1.09 | 23.66 | 1.78 | 0.0011  |
| 27 | 5453.4  | 6073.7 | 0.994 | 0.005 | 2.634 | 0.901 | 26.07 | 0.58 | 29.85 | 1.09 | 0.19    |
| 28 | 2273.1  | 4477.5 | 0.993 | 0.009 | 1.874 | 0.927 | 23.30 | 0.60 | 27.28 | 1.32 | 0.0099  |
| 29 | 2035.0  | 5691.6 | 0.990 | 0.021 | 1.081 | 0.623 | 23.49 | 0.43 | 28.74 | 0.97 | 0.0042  |
| 30 | 7412.1  | 5961.2 | 0.990 | 0.005 | 3.626 | 0.816 | 19.42 | 0.88 | 22.67 | 1.60 | 7.5E-5  |
| 31 | 8485.2  | 6743.9 | 0.984 | 0.007 | 2.585 | 0.628 | 19.06 | 0.73 | 22.31 | 1.22 | 0.0017  |
| 32 | 6362.7  | 8650.8 | 0.985 | 0.013 | 2.343 | 1.018 | 20.14 | 0.91 | 24.87 | 2.03 | 2.1E-6  |
| 33 | 7562.6  | 6285.5 | 0.981 | 0.010 | 2.278 | 0.635 | 19.86 | 0.85 | 23.91 | 1.56 | 0.0019  |
| 34 | 5161.5  | 6406.4 | 0.985 | 0.011 | 2.179 | 0.839 | 22.61 | 0.78 | 25.83 | 1.64 | 3.8E-7  |
| 35 | 1379.5  | 3017.3 | 0.993 | 0.007 | 2.331 | 1.247 | 24.49 | 0.99 | 29.45 | 1.66 | 8.6E-9  |
| 36 | 696.7   | 829.9  | 0.988 | 0.006 | 2.315 | 1.079 | 23.52 | 1.14 | 26.69 | 1.83 | 4.8E-16 |
| 37 | 776.9   | 1351.9 | 0.991 | 0.006 | 2.099 | 1.013 | 22.57 | 0.90 | 26.53 | 1.39 | 7.1E-10 |
| 38 | 859.9   | 1118.9 | 0.987 | 0.007 | 2.690 | 1.233 | 23.96 | 1.54 | 27.77 | 2.45 | 1.3E-15 |
| 40 | 1638.9  | 3322.0 | 0.995 | 0.006 | 2.200 | 1.065 | 26.51 | 0.66 | 30.99 | 1.26 | 8.8E-10 |
| 41 | 2062.3  | 3527.4 | 0.995 | 0.004 | 2.176 | 1.003 | 23.56 | 0.53 | 26.64 | 1.02 | 0.048   |
| 42 | 851.7   | 2106.3 | 0.994 | 0.006 | 2.034 | 1.025 | 23.08 | 0.77 | 27.91 | 1.24 | 1.8E-8  |
| 43 | 1018.6  | 3353.9 | 0.998 | 0.003 | 1.661 | 0.919 | 23.38 | 0.40 | 26.59 | 0.59 | 0.39    |
| 44 | 11976.9 | 6714.7 | 0.984 | 0.006 | 4.375 | 0.715 | 24.38 | 1.08 | 25.83 | 1.95 | 0.24    |
| 45 | 626.0   | 1165.5 | 0.987 | 0.011 | 1.608 | 0.773 | 26.01 | 0.83 | 29.57 | 1.46 | 7.4E-10 |
| 46 | 1001.4  | 2195.0 | 0.996 | 0.005 | 1.687 | 0.884 | 24.52 | 0.50 | 27.99 | 0.84 | 0.0045  |
| 47 | 1264.1  | 2099.9 | 0.990 | 0.008 | 2.505 | 1.279 | 24.69 | 1.37 | 29.21 | 2.28 | 1.5E-8  |
| 48 | 9362.1  | 7343.5 | 0.989 | 0.005 | 3.025 | 0.742 | 26.75 | 0.75 | 29.97 | 1.06 | 0.55    |
| 49 | 2072.1  | 4225.0 | 0.994 | 0.008 | 1.935 | 0.977 | 25.72 | 0.58 | 30.10 | 1.17 | 3.4E-6  |
| 50 | 5760.0  | 6387.2 | 0.991 | 0.006 | 3.043 | 1.087 | 22.00 | 0.92 | 24.54 | 1.69 | 1.9E-5  |
| 54 | 6663.0  | 6584.2 | 0.988 | 0.008 | 2.507 | 0.790 | 21.69 | 0.69 | 24.71 | 1.36 | 0.0014  |
| 55 | 6218.0  | 5753.0 | 0.987 | 0.008 | 2.913 | 0.841 | 21.72 | 0.94 | 23.89 | 1.68 | 9.5E-5  |
| 56 | 9301.2  | 6502.7 | 0.984 | 0.007 | 3.223 | 0.588 | 22.62 | 0.95 | 24.60 | 1.65 | 0.012   |
| 57 | 4002.6  | 6708.6 | 0.986 | 0.012 | 2.404 | 1.012 | 20.63 | 1.35 | 22.67 | 2.61 | 0.035   |
| 60 | 4778.5  | 6066.2 | 0.991 | 0.008 | 1.970 | 0.778 | 25.17 | 0.54 | 29.71 | 1.11 | 0.04    |
| 61 | 1784.4  | 3846.7 | 0.990 | 0.018 | 1.235 | 0.542 | 23.58 | 0.54 | 28.56 | 1.07 | 0.00039 |
| 62 | 7303.9  | 5723.1 | 0.992 | 0.004 | 2.662 | 0.718 | 22.73 | 0.52 | 25.98 | 0.95 | 0.16    |

|     |         |         |       |       |       |       |       |      |       |      |         |
|-----|---------|---------|-------|-------|-------|-------|-------|------|-------|------|---------|
| 64  | 6624.3  | 6963.6  | 0.990 | 0.007 | 2.382 | 0.769 | 23.61 | 0.61 | 28.57 | 1.20 | 0.35    |
| 65  | 7540.9  | 6286.7  | 0.985 | 0.008 | 2.973 | 0.666 | 22.05 | 0.83 | 23.45 | 1.47 | 0.00047 |
| 66  | 10309.3 | 7208.1  | 0.983 | 0.009 | 2.586 | 0.615 | 23.62 | 0.67 | 25.91 | 1.37 | 0.076   |
| 67  | 6840.6  | 6698.8  | 0.991 | 0.005 | 3.165 | 0.946 | 21.64 | 0.81 | 23.72 | 1.37 | 0.0037  |
| 68  | 7752.0  | 5519.4  | 0.988 | 0.005 | 2.479 | 0.586 | 20.35 | 0.52 | 22.26 | 0.92 | 0.053   |
| 69  | 5330.7  | 6374.2  | 0.987 | 0.011 | 2.530 | 0.913 | 21.63 | 1.06 | 24.34 | 1.98 | 1.9E-9  |
| 70  | 7491.7  | 5814.5  | 0.989 | 0.006 | 2.988 | 0.722 | 21.14 | 0.77 | 24.03 | 1.50 | 0.00055 |
| 71  | 10661.6 | 7848.3  | 0.986 | 0.006 | 3.204 | 0.683 | 26.22 | 0.69 | 28.64 | 1.37 | 0.49    |
| 72  | 7625.8  | 6129.6  | 0.989 | 0.006 | 2.928 | 0.798 | 23.67 | 0.68 | 26.43 | 1.26 | 0.047   |
| 73  | 4325.8  | 7026.0  | 0.991 | 0.008 | 1.556 | 0.746 | 27.01 | 0.41 | 31.78 | 0.89 | 0.33    |
| 74  | 7996.9  | 5282.4  | 0.992 | 0.003 | 4.516 | 0.941 | 22.76 | 0.96 | 25.29 | 1.58 | 0.0048  |
| 75  | 3485.2  | 7365.0  | 0.993 | 0.008 | 2.494 | 1.289 | 23.98 | 0.87 | 28.36 | 1.76 | 0.0032  |
| 76  | 6411.2  | 6089.4  | 0.987 | 0.008 | 2.425 | 0.735 | 22.27 | 0.70 | 24.51 | 1.36 | 0.0035  |
| 78  | 740.7   | 2041.7  | 0.996 | 0.004 | 1.462 | 0.758 | 24.96 | 0.51 | 29.21 | 0.83 | 0.024   |
| 80  | 8630.4  | 5326.9  | 0.990 | 0.005 | 3.334 | 0.652 | 23.61 | 0.82 | 25.78 | 1.45 | 0.066   |
| 81  | 6500.7  | 6212.4  | 0.990 | 0.006 | 2.705 | 0.845 | 22.35 | 0.67 | 24.71 | 1.32 | 0.018   |
| 82  | 7485.0  | 7016.4  | 0.991 | 0.005 | 4.104 | 0.912 | 23.32 | 0.89 | 24.91 | 1.58 | 0.00021 |
| 83  | 2440.1  | 5967.1  | 0.982 | 0.024 | 1.441 | 0.776 | 26.51 | 0.91 | 29.29 | 1.83 | 0.00053 |
| 84  | 507.6   | 1195.3  | 0.997 | 0.005 | 1.227 | 0.620 | 26.45 | 0.38 | 29.22 | 0.68 | 0.1     |
| 85  | 8465.1  | 5455.9  | 0.991 | 0.004 | 5.172 | 0.878 | 23.23 | 0.98 | 24.59 | 1.89 | 0.1     |
| 87  | 3921.1  | 6067.5  | 0.991 | 0.008 | 2.525 | 1.089 | 24.64 | 0.95 | 27.64 | 1.68 | 0.00082 |
| 88  | 6839.1  | 6375.5  | 0.992 | 0.005 | 3.735 | 1.130 | 27.18 | 0.91 | 30.90 | 1.87 | 0.055   |
| 89  | 3705.7  | 7321.4  | 0.994 | 0.006 | 2.133 | 1.075 | 24.79 | 0.57 | 27.97 | 1.17 | 0.18    |
| 90  | 5561.5  | 6342.8  | 0.983 | 0.010 | 2.242 | 0.743 | 20.54 | 0.86 | 22.78 | 1.63 | 1.6E-8  |
| 92  | 1739.9  | 3954.8  | 0.994 | 0.011 | 1.333 | 0.571 | 21.68 | 0.37 | 25.18 | 0.70 | 0.0009  |
| 94  | 9099.1  | 5688.2  | 0.978 | 0.009 | 2.089 | 0.432 | 16.39 | 0.51 | 18.74 | 0.96 | 5.3E-5  |
| 95  | 17681.1 | 6582.7  | 1.005 | 0.005 | 1.867 | 0.778 | 16.77 | 0.31 | 20.38 | 0.61 | 0.99    |
| 96  | 24870.7 | 3501.5  | 1.009 | 0.012 | 0.996 | 0.501 | 17.07 | 0.29 | 20.22 | 0.43 | 1.0     |
| 97  | 24694.1 | 6669.5  | 0.997 | 0.004 | 1.695 | 0.843 | 14.82 | 0.24 | 17.70 | 0.28 | 0.98    |
| 99  | 9351.1  | 15332.5 | 0.997 | 0.010 | 0.930 | 0.890 | 13.15 | 0.31 | 16.15 | 0.42 | 1.0     |
| 100 | 816.8   | 2357.6  | 0.992 | 0.015 | 0.710 | 0.340 | 12.07 | 0.65 | 16.89 | 0.90 | 3.2E-7  |
| 101 | 987.5   | 3166.6  | 0.993 | 0.018 | 0.610 | 0.326 | 12.17 | 0.56 | 16.59 | 0.74 | 0.004   |

## SIMPX-SUMO1

| Residue | $k_{ex}$ (s <sup>-1</sup> ) | ± std   | $p_M$ | ± std | $\Delta\Omega_{15N}$ (ppm) | ± std | $R_{2,0}$<br>60MHz<br>(s <sup>-1</sup> ) | ± std | $R_{2,0}$<br>80MHz<br>(s <sup>-1</sup> ) | ± std | p       |
|---------|-----------------------------|---------|-------|-------|----------------------------|-------|------------------------------------------|-------|------------------------------------------|-------|---------|
| 2       | 14753.9                     | 9942.4  | 0.992 | 0.005 | 1.717                      | 0.514 | 9.60                                     | 0.39  | 12.52                                    | 0.42  | 0.98    |
| 3       | 32423.8                     | 15889.2 | 0.996 | 0.006 | 1.615                      | 0.662 | 4.73                                     | 0.29  | 7.99                                     | 0.29  | 1.0     |
| 4       | 23945.5                     | 2047.3  | 0.991 | 0.003 | 1.801                      | 0.232 | 4.33                                     | 0.19  | 5.59                                     | 0.14  | 1.0     |
| 5       | 16543.0                     | 10260.3 | 0.990 | 0.005 | 1.829                      | 0.483 | 4.38                                     | 0.26  | 6.18                                     | 0.29  | 1.0     |
| 6       | 11040.0                     | 6992.8  | 0.992 | 0.007 | 0.923                      | 0.313 | 3.87                                     | 0.19  | 5.61                                     | 0.24  | 0.99    |
| 7       | 2384.6                      | 3946.1  | 0.993 | 0.004 | 1.083                      | 0.402 | 4.68                                     | 0.16  | 4.93                                     | 0.29  | 0.056   |
| 9       | 786.3                       | 2183.0  | 0.997 | 0.006 | 0.645                      | 0.387 | 6.09                                     | 0.23  | 7.89                                     | 0.30  | 0.18    |
| 10      | 124.7                       | 159.2   | 0.991 | 0.006 | 0.867                      | 0.603 | 6.76                                     | 0.32  | 9.35                                     | 0.38  | 6.8E-7  |
| 11      | 1933.0                      | 14366.9 | 1.000 | 0.002 | 0.408                      | 0.475 | 2.39                                     | 0.04  | 2.38                                     | 0.05  | 0.98    |
| 13      | 11850.2                     | 4171.7  | 0.982 | 0.005 | 1.760                      | 0.230 | 5.62                                     | 0.24  | 6.20                                     | 0.41  | 0.19    |
| 14      | 6495.6                      | 5941.6  | 0.988 | 0.007 | 1.162                      | 0.338 | 5.94                                     | 0.28  | 7.57                                     | 0.40  | 0.39    |
| 15      | 5403.9                      | 6001.1  | 0.982 | 0.013 | 1.524                      | 0.534 | 6.52                                     | 0.56  | 8.97                                     | 0.96  | 0.00054 |
| 17      | 834.3                       | 1157.9  | 0.986 | 0.013 | 1.444                      | 0.640 | 7.37                                     | 0.98  | 9.62                                     | 1.84  | 3.3E-6  |
| 18      | 1062.6                      | 1511.4  | 0.991 | 0.010 | 0.869                      | 0.440 | 11.02                                    | 0.31  | 12.88                                    | 0.44  | 1.0E-05 |
| 19      | 7668.1                      | 4433.6  | 0.985 | 0.005 | 2.074                      | 0.380 | 11.31                                    | 0.45  | 13.06                                    | 0.66  | 0.086   |
| 20      | 538.4                       | 983.5   | 0.959 | 0.051 | 0.800                      | 0.381 | 16.89                                    | 0.69  | 16.55                                    | 1.27  | 9.5E-19 |
| 23      | 1911.2                      | 2428.8  | 0.977 | 0.020 | 1.802                      | 0.677 | 25.22                                    | 2.20  | 31.14                                    | 4.08  | 0.00011 |
| 26      | 1129.4                      | 1401.2  | 0.988 | 0.010 | 2.275                      | 1.038 | 26.16                                    | 1.37  | 29.88                                    | 2.50  | 1.2E-5  |
| 27      | 1478.9                      | 1990.1  | 0.992 | 0.006 | 2.020                      | 0.857 | 27.04                                    | 0.99  | 30.89                                    | 1.43  | 0.065   |
| 28      | 5242.6                      | 6017.1  | 0.974 | 0.013 | 2.494                      | 0.736 | 22.88                                    | 1.62  | 21.30                                    | 2.87  | 0.003   |
| 30      | 13872.3                     | 7185.9  | 0.988 | 0.004 | 3.553                      | 0.721 | 20.41                                    | 0.79  | 25.33                                    | 1.37  | 0.85    |
| 31      | 18952.9                     | 6232.4  | 0.988 | 0.003 | 3.619                      | 0.495 | 19.51                                    | 0.60  | 22.20                                    | 0.86  | 0.92    |
| 32      | 8036.8                      | 6564.5  | 0.982 | 0.007 | 3.154                      | 0.670 | 19.46                                    | 1.05  | 23.36                                    | 1.82  | 0.022   |
| 33      | 44634.6                     | 9174.2  | 0.981 | 0.003 | 8.278                      | 0.589 | 11.09                                    | 1.33  | 14.43                                    | 2.09  | 0.92    |
| 34      | 6973.0                      | 6025.1  | 0.987 | 0.005 | 3.147                      | 0.830 | 23.72                                    | 1.04  | 26.16                                    | 1.79  | 0.21    |
| 35      | 64393.8                     | 6819.7  | 0.990 | 0.001 | 12.218                     | 0.570 | 20.73                                    | 1.66  | 19.16                                    | 1.32  | 0.95    |
| 38      | 7640.8                      | 12009.9 | 0.987 | 0.014 | 5.221                      | 2.666 | 25.66                                    | 5.92  | 23.37                                    | 9.28  | 0.087   |
| 41      | 3703.8                      | 5728.1  | 0.993 | 0.007 | 1.821                      | 0.861 | 25.79                                    | 0.85  | 28.27                                    | 1.04  | 0.74    |
| 42      | 17066.8                     | 16749.0 | 1.013 | 0.019 | 2.098                      | 0.626 | 32.89                                    | 2.75  | 40.83                                    | 1.77  | 0.0047  |
| 43      | 441.5                       | 426.9   | 0.985 | 0.012 | 1.622                      | 0.851 | 26.02                                    | 0.83  | 26.80                                    | 1.37  | 3.1E-5  |

|    |         |         |       |       |       |        |       |      |       |      |         |
|----|---------|---------|-------|-------|-------|--------|-------|------|-------|------|---------|
| 44 | 5618.4  | 5114.6  | 0.990 | 0.005 | 3.986 | 1.066  | 28.44 | 1.75 | 29.54 | 2.71 | 0.26    |
| 46 | 13339.7 | 6766.2  | 0.990 | 0.003 | 4.355 | 0.618  | 11.62 | 0.95 | 15.92 | 1.63 | 0.85    |
| 48 | 1578.0  | 2871.5  | 0.986 | 0.012 | 2.761 | 1.443  | 29.85 | 3.56 | 33.86 | 4.97 | 0.00045 |
| 52 | 18282.4 | 7725.3  | 0.990 | 0.005 | 2.902 | 0.710  | 21.21 | 0.63 | 24.31 | 0.55 | 1.0     |
| 53 | 23264.1 | 13117.5 | 0.993 | 0.008 | 2.238 | 1.085  | 17.57 | 0.63 | 23.03 | 0.70 | 0.95    |
| 54 | 19182.9 | 8057.9  | 0.986 | 0.004 | 3.943 | 0.529  | 23.58 | 0.72 | 26.04 | 1.25 | 0.86    |
| 55 | 938.0   | 972.6   | 0.990 | 0.008 | 2.364 | 1.158  | 24.23 | 1.41 | 29.32 | 2.14 | 0.0013  |
| 56 | 6910.2  | 5993.7  | 0.980 | 0.010 | 2.666 | 0.699  | 24.66 | 1.26 | 27.62 | 2.24 | 0.12    |
| 57 | 310.0   | 1284.9  | 0.852 | 0.195 | 0.297 | 0.103  | 14.28 | 0.43 | 16.08 | 0.71 | 1.6E-6  |
| 60 | 5364.9  | 5670.4  | 0.989 | 0.007 | 2.136 | 0.724  | 21.54 | 0.68 | 25.05 | 1.15 | 0.22    |
| 61 | 739.2   | 1302.2  | 0.994 | 0.005 | 1.734 | 0.844  | 24.96 | 0.85 | 30.97 | 1.16 | 0.0036  |
| 62 | 1194.9  | 1607.1  | 0.983 | 0.020 | 1.213 | 0.541  | 24.28 | 0.91 | 28.08 | 1.35 | 0.00084 |
| 63 | 3131.9  | 3267.1  | 0.997 | 0.001 | 3.541 | 1.584  | 25.05 | 0.66 | 27.22 | 0.75 | 0.52    |
| 64 | 1500.2  | 6259.7  | 0.998 | 0.002 | 2.600 | 2.164  | 24.43 | 0.73 | 32.17 | 1.15 | 0.42    |
| 65 | 34722.2 | 6549.0  | 0.993 | 0.003 | 4.311 | 0.745  | 24.70 | 0.51 | 26.53 | 0.57 | 0.99    |
| 66 | 4032.7  | 4163.9  | 0.996 | 0.002 | 2.794 | 1.043  | 26.84 | 0.66 | 29.44 | 0.95 | 0.71    |
| 67 | 4051.0  | 5242.3  | 0.984 | 0.012 | 1.881 | 0.661  | 22.93 | 0.96 | 24.34 | 1.82 | 0.17    |
| 68 | 2579.9  | 4234.9  | 0.993 | 0.006 | 1.663 | 0.883  | 22.02 | 0.59 | 23.92 | 1.04 | 0.4     |
| 69 | 8780.5  | 6162.5  | 0.980 | 0.008 | 2.561 | 0.501  | 22.50 | 0.71 | 23.98 | 1.21 | 0.055   |
| 70 | 1748.4  | 2406.8  | 0.987 | 0.013 | 1.678 | 0.808  | 22.04 | 1.09 | 26.50 | 1.95 | 5.2E-6  |
| 71 | 40.8    | 49.0    | 1.004 | 0.008 | 3.363 | 17.589 | 28.73 | 0.67 | 31.36 | 0.60 | 0.97    |
| 72 | 7876.8  | 6583.9  | 0.991 | 0.005 | 4.798 | 1.171  | 23.07 | 1.34 | 26.52 | 2.63 | 0.42    |
| 74 | 700.0   | 993.7   | 0.987 | 0.010 | 1.853 | 0.913  | 25.40 | 1.12 | 29.55 | 1.78 | 0.002   |
| 75 | 7653.8  | 5286.8  | 0.991 | 0.004 | 4.378 | 0.937  | 24.01 | 1.30 | 27.29 | 2.10 | 0.12    |
| 76 | 11956.2 | 7749.9  | 0.993 | 0.003 | 7.159 | 0.982  | 18.23 | 2.34 | 20.59 | 2.73 | 0.7     |
| 80 | 937.9   | 1270.8  | 0.969 | 0.030 | 1.185 | 0.519  | 26.19 | 1.33 | 28.51 | 2.44 | 8.9E-7  |
| 81 | 1194.4  | 1830.1  | 0.979 | 0.026 | 1.363 | 0.626  | 24.40 | 1.07 | 27.05 | 1.94 | 5.9E-6  |
| 82 | 1746.9  | 2193.9  | 0.994 | 0.003 | 2.049 | 0.887  | 26.38 | 0.87 | 28.71 | 1.26 | 0.3     |
| 83 | 3919.2  | 6802.6  | 0.983 | 0.014 | 1.838 | 0.835  | 29.14 | 1.73 | 32.44 | 2.09 | 0.46    |
| 84 | 1565.7  | 5056.2  | 1.002 | 0.002 | 1.904 | 1.161  | 28.59 | 0.55 | 32.24 | 0.58 | 0.9     |
| 87 | 2647.3  | 3820.3  | 0.985 | 0.010 | 2.527 | 0.980  | 25.48 | 1.74 | 29.29 | 2.85 | 0.0032  |
| 88 | 2284.8  | 2989.8  | 0.991 | 0.008 | 2.027 | 0.816  | 25.46 | 1.06 | 30.40 | 1.67 | 0.064   |

|     |         |         |       |       |       |       |       |      |       |      |         |
|-----|---------|---------|-------|-------|-------|-------|-------|------|-------|------|---------|
| 89  | 5717.4  | 6027.1  | 0.991 | 0.005 | 3.040 | 1.051 | 25.73 | 1.01 | 27.05 | 1.62 | 0.53    |
| 90  | 2614.2  | 4095.5  | 0.992 | 0.006 | 2.189 | 1.088 | 23.52 | 0.98 | 26.06 | 1.54 | 0.054   |
| 94  | 404.1   | 2766.1  | 0.999 | 0.002 | 1.306 | 1.274 | 15.55 | 0.52 | 20.16 | 0.53 | 1.0     |
| 95  | 6206.2  | 7221.2  | 0.992 | 0.007 | 1.455 | 0.673 | 10.90 | 0.37 | 14.61 | 0.44 | 0.57    |
| 96  | 18499.0 | 6941.1  | 0.994 | 0.004 | 1.373 | 0.526 | 10.32 | 0.24 | 13.20 | 0.29 | 1.0     |
| 97  | 9821.4  | 11617.3 | 0.996 | 0.004 | 1.767 | 0.791 | 8.61  | 0.43 | 12.55 | 0.59 | 0.98    |
| 99  | 17042.0 | 5449.6  | 0.990 | 0.005 | 2.045 | 0.489 | 6.81  | 0.38 | 10.37 | 0.58 | 1.0     |
| 100 | 357.5   | 1450.7  | 0.982 | 0.019 | 0.819 | 0.406 | 6.31  | 0.40 | 8.17  | 0.58 | 5.1E-16 |
| 101 | 483.8   | 1266.4  | 0.986 | 0.021 | 0.769 | 0.378 | 6.63  | 0.28 | 8.12  | 0.49 | 1.1E-15 |

### ZZ domain-SUMO1

| Residue | $k_{ex}$ (s <sup>-1</sup> ) | $\pm$ std | $p_M$ | $\pm$ std | $\Delta\Omega_{15N}$ (ppm) | $\pm$ std | $R_{2,0}$<br>60MHz<br>(s <sup>-1</sup> ) | $\pm$ std | $R_{2,0}$<br>80MHz<br>(s <sup>-1</sup> ) | $\pm$ std | p       |
|---------|-----------------------------|-----------|-------|-----------|----------------------------|-----------|------------------------------------------|-----------|------------------------------------------|-----------|---------|
| 2       | 2103.6                      | 2734.2    | 0.992 | 0.006     | 3.126                      | 1.582     | 19.50                                    | 1.51      | 23.33                                    | 2.32      | 6.4E-12 |
| 3       | 1838.9                      | 2758.1    | 0.986 | 0.014     | 1.015                      | 0.505     | 7.83                                     | 0.36      | 10.73                                    | 0.73      | 1.3E-10 |
| 4       | 1963.8                      | 3139.0    | 0.992 | 0.007     | 2.500                      | 1.181     | 7.28                                     | 1.09      | 10.34                                    | 1.63      | 3.1E-21 |
| 5       | 1808.2                      | 2380.5    | 0.989 | 0.009     | 0.930                      | 0.493     | 6.16                                     | 0.25      | 8.77                                     | 0.52      | 6.0E-12 |
| 6       | 6898.0                      | 4968.5    | 0.984 | 0.010     | 1.144                      | 0.367     | 5.74                                     | 0.24      | 7.77                                     | 0.40      | 0.032   |
| 7       | 2344.3                      | 4089.7    | 0.990 | 0.011     | 0.715                      | 0.504     | 6.17                                     | 0.18      | 8.58                                     | 0.40      | 6.3E-5  |
| 9       | 13101.9                     | 15729.4   | 0.989 | 0.015     | 1.536                      | 0.899     | 10.89                                    | 0.33      | 13.92                                    | 0.76      | 0.87    |
| 10      | 1394.0                      | 3423.3    | 0.992 | 0.010     | 0.746                      | 0.626     | 12.98                                    | 0.19      | 16.93                                    | 0.53      | 0.002   |
| 11      | 18293.1                     | 1404.9    | 0.993 | 0.005     | 0.832                      | 0.232     | 2.39                                     | 0.04      | 2.64                                     | 0.08      | 1.0     |
| 13      | 1733.9                      | 2549.3    | 0.953 | 0.038     | 0.402                      | 0.188     | 9.74                                     | 0.24      | 12.15                                    | 0.47      | 2.6E-5  |
| 14      | 348.4                       | 4306.0    | 0.997 | 0.005     | 0.588                      | 0.459     | 9.31                                     | 0.21      | 12.31                                    | 0.31      | 0.15    |
| 15      | 4198.4                      | 5329.5    | 0.988 | 0.010     | 1.216                      | 0.623     | 12.77                                    | 0.34      | 16.37                                    | 0.76      | 0.003   |
| 16      | 986.0                       | 2678.2    | 0.956 | 0.090     | 0.599                      | 0.368     | 17.37                                    | 0.52      | 24.82                                    | 1.29      | 1.6E-8  |
| 18      | 1927.2                      | 3165.0    | 0.993 | 0.006     | 1.252                      | 0.765     | 14.67                                    | 0.33      | 17.91                                    | 0.61      | 9.2E-8  |
| 19      | 10106.8                     | 5766.1    | 0.965 | 0.014     | 1.869                      | 0.339     | 15.20                                    | 0.62      | 17.91                                    | 1.16      | 0.0069  |
| 20      | 1068.7                      | 1443.2    | 0.988 | 0.012     | 0.872                      | 0.380     | 18.76                                    | 0.35      | 21.35                                    | 0.47      | 1.6E-5  |
| 21      | 1054.7                      | 2936.5    | 0.990 | 0.015     | 1.100                      | 0.699     | 24.72                                    | 0.49      | 30.71                                    | 1.02      | 0.0077  |
| 22      | 4083.9                      | 4801.2    | 0.983 | 0.013     | 2.493                      | 1.012     | 25.68                                    | 1.66      | 30.10                                    | 3.14      | 0.0059  |
| 23      | 2503.9                      | 3976.6    | 0.996 | 0.003     | 3.124                      | 1.580     | 25.40                                    | 0.78      | 29.31                                    | 1.24      | 0.033   |

|    |         |         |       |       |       |       |       |      |       |      |         |
|----|---------|---------|-------|-------|-------|-------|-------|------|-------|------|---------|
| 24 | 928.0   | 1349.0  | 0.991 | 0.007 | 2.138 | 1.067 | 26.21 | 0.94 | 31.41 | 1.67 | 0.00014 |
| 25 | 2129.3  | 2750.9  | 0.994 | 0.004 | 2.566 | 1.246 | 26.09 | 0.84 | 30.42 | 1.29 | 0.0031  |
| 26 | 2190.4  | 2877.5  | 0.995 | 0.003 | 2.409 | 1.167 | 26.49 | 0.74 | 30.57 | 1.21 | 0.016   |
| 27 | 6475.1  | 4763.3  | 0.990 | 0.005 | 3.998 | 1.036 | 25.80 | 1.26 | 27.93 | 2.06 | 0.0094  |
| 28 | 678.4   | 621.6   | 0.994 | 0.003 | 2.508 | 1.231 | 24.56 | 0.68 | 30.22 | 0.79 | 8.7E-5  |
| 29 | 6803.0  | 4901.2  | 0.985 | 0.009 | 2.481 | 0.604 | 23.65 | 0.99 | 27.87 | 1.61 | 0.013   |
| 30 | 5094.1  | 3940.2  | 0.994 | 0.003 | 3.284 | 0.992 | 21.45 | 0.74 | 25.67 | 1.22 | 0.014   |
| 31 | 2886.6  | 3715.2  | 0.990 | 0.009 | 1.759 | 0.922 | 20.83 | 0.66 | 25.47 | 1.22 | 3.9E-5  |
| 32 | 3578.9  | 4420.9  | 0.990 | 0.007 | 2.433 | 1.153 | 21.22 | 0.99 | 27.25 | 1.79 | 1.9E-5  |
| 33 | 2425.7  | 3502.6  | 0.993 | 0.006 | 1.616 | 0.947 | 21.88 | 0.59 | 26.21 | 1.01 | 0.02    |
| 34 | 5286.9  | 4236.1  | 0.987 | 0.007 | 2.593 | 0.771 | 24.19 | 1.02 | 27.99 | 1.71 | 0.015   |
| 35 | 1899.8  | 2072.9  | 0.995 | 0.002 | 3.851 | 1.670 | 25.52 | 1.39 | 30.88 | 1.89 | 0.00064 |
| 36 | 1185.0  | 1339.6  | 0.988 | 0.008 | 2.541 | 1.130 | 25.40 | 1.49 | 30.65 | 2.35 | 4.3E-8  |
| 37 | 1314.7  | 1816.7  | 0.982 | 0.020 | 1.600 | 0.786 | 23.52 | 1.11 | 28.20 | 1.81 | 4.6E-9  |
| 38 | 2235.2  | 3041.3  | 0.980 | 0.022 | 1.878 | 0.821 | 25.51 | 1.61 | 31.07 | 3.06 | 0.00011 |
| 40 | 6660.1  | 4592.0  | 0.971 | 0.015 | 2.504 | 0.587 | 25.36 | 1.60 | 30.58 | 2.86 | 0.00035 |
| 41 | 7893.9  | 5651.5  | 0.989 | 0.005 | 3.666 | 0.728 | 24.05 | 1.01 | 27.28 | 1.65 | 0.39    |
| 42 | 8286.5  | 6137.0  | 0.978 | 0.009 | 3.866 | 0.699 | 21.58 | 1.59 | 25.71 | 2.79 | 0.00039 |
| 43 | 9018.2  | 5096.9  | 0.990 | 0.004 | 4.734 | 0.931 | 22.98 | 1.12 | 25.52 | 1.94 | 0.19    |
| 44 | 8938.0  | 6014.1  | 0.991 | 0.004 | 4.000 | 0.910 | 28.51 | 0.84 | 31.34 | 1.52 | 0.65    |
| 45 | 1116.1  | 1572.3  | 0.986 | 0.015 | 1.612 | 0.807 | 27.00 | 0.88 | 29.41 | 1.37 | 7.0E-07 |
| 46 | 992.3   | 1419.9  | 0.996 | 0.002 | 2.154 | 0.904 | 26.10 | 0.51 | 30.69 | 0.88 | 0.11    |
| 47 | 1333.8  | 1763.6  | 0.978 | 0.024 | 1.506 | 0.684 | 27.19 | 1.47 | 32.30 | 2.27 | 0.00059 |
| 48 | 7404.7  | 6171.8  | 0.985 | 0.008 | 2.621 | 0.680 | 29.13 | 0.94 | 32.77 | 1.76 | 0.59    |
| 49 | 1202.9  | 1722.9  | 0.990 | 0.010 | 1.494 | 0.665 | 28.20 | 0.61 | 32.09 | 1.02 | 0.00081 |
| 50 | 1683.5  | 2290.3  | 0.994 | 0.004 | 2.184 | 1.124 | 24.22 | 0.76 | 28.97 | 1.09 | 0.00033 |
| 52 | 27915.6 | 9564.6  | 0.993 | 0.003 | 3.525 | 0.776 | 29.47 | 0.43 | 29.79 | 0.55 | 0.96    |
| 53 | 15334.7 | 14622.8 | 0.993 | 0.006 | 2.609 | 1.024 | 22.58 | 0.33 | 24.69 | 0.72 | 1.0     |
| 54 | 10163.1 | 5024.0  | 0.987 | 0.004 | 3.731 | 0.677 | 22.45 | 0.87 | 25.91 | 1.57 | 0.044   |
| 55 | 2501.0  | 4104.6  | 0.978 | 0.022 | 1.307 | 0.704 | 23.94 | 0.97 | 28.38 | 1.90 | 0.046   |
| 56 | 21323.5 | 7138.0  | 0.971 | 0.006 | 5.742 | 0.535 | 21.17 | 1.57 | 21.46 | 2.60 | 0.28    |
| 57 | 2156.6  | 3936.1  | 0.997 | 0.002 | 2.862 | 1.453 | 22.30 | 0.78 | 25.62 | 1.19 | 0.42    |

|    |         |         |       |       |       |       |       |      |       |      |         |
|----|---------|---------|-------|-------|-------|-------|-------|------|-------|------|---------|
| 60 | 2329.3  | 3276.6  | 0.993 | 0.006 | 1.826 | 0.884 | 25.88 | 0.59 | 30.53 | 1.00 | 0.012   |
| 61 | 9744.7  | 5835.5  | 0.973 | 0.009 | 2.995 | 0.539 | 22.68 | 1.00 | 26.77 | 1.86 | 0.015   |
| 62 | 6527.3  | 5110.0  | 0.993 | 0.004 | 2.798 | 0.898 | 24.13 | 0.65 | 28.58 | 1.03 | 0.54    |
| 64 | 9284.8  | 6124.7  | 0.980 | 0.009 | 3.279 | 0.529 | 22.93 | 1.21 | 26.71 | 2.25 | 0.17    |
| 65 | 4623.0  | 4658.9  | 0.982 | 0.012 | 1.761 | 0.559 | 24.56 | 0.83 | 27.77 | 1.50 | 0.037   |
| 66 | 6247.8  | 5661.0  | 0.989 | 0.006 | 2.519 | 0.770 | 25.93 | 0.79 | 28.60 | 1.38 | 0.43    |
| 67 | 6711.6  | 5354.5  | 0.987 | 0.007 | 3.534 | 0.804 | 22.81 | 1.17 | 25.27 | 2.06 | 0.00019 |
| 68 | 5116.7  | 4475.9  | 0.990 | 0.006 | 2.031 | 0.638 | 22.43 | 0.64 | 24.69 | 1.12 | 0.12    |
| 70 | 2592.1  | 2873.0  | 0.994 | 0.004 | 2.181 | 0.952 | 23.66 | 0.60 | 27.07 | 0.97 | 0.0058  |
| 71 | 9314.6  | 7413.8  | 0.976 | 0.011 | 3.556 | 0.689 | 25.67 | 1.35 | 27.65 | 2.36 | 0.053   |
| 72 | 19707.5 | 5492.4  | 0.987 | 0.003 | 5.150 | 0.522 | 24.26 | 0.66 | 27.31 | 1.26 | 0.89    |
| 73 | 11259.3 | 5589.7  | 0.986 | 0.006 | 3.208 | 0.714 | 26.90 | 0.69 | 32.91 | 1.42 | 0.59    |
| 74 | 5854.0  | 4558.8  | 0.991 | 0.005 | 3.391 | 0.979 | 24.23 | 1.01 | 28.42 | 1.85 | 0.00052 |
| 75 | 1946.3  | 2627.4  | 0.996 | 0.003 | 1.780 | 0.778 | 26.77 | 0.53 | 31.85 | 0.65 | 0.42    |
| 76 | 4808.5  | 4410.2  | 0.991 | 0.004 | 3.218 | 1.080 | 24.22 | 1.06 | 25.68 | 1.74 | 0.045   |
| 78 | 4694.8  | 4155.2  | 0.995 | 0.002 | 4.072 | 1.188 | 25.74 | 0.90 | 29.60 | 1.11 | 0.044   |
| 80 | 12925.9 | 7062.8  | 0.990 | 0.005 | 2.960 | 0.656 | 26.19 | 0.68 | 29.48 | 0.96 | 0.86    |
| 81 | 6904.2  | 5637.7  | 0.979 | 0.010 | 2.651 | 0.659 | 22.75 | 1.13 | 24.72 | 1.91 | 0.01    |
| 82 | 9195.1  | 5890.7  | 0.985 | 0.006 | 3.704 | 0.644 | 24.03 | 0.97 | 26.24 | 1.80 | 0.012   |
| 83 | 10246.7 | 6316.1  | 0.990 | 0.004 | 4.525 | 0.873 | 26.43 | 1.19 | 29.88 | 2.30 | 0.67    |
| 84 | 2161.6  | 2769.9  | 0.997 | 0.002 | 2.299 | 1.143 | 27.20 | 0.48 | 29.02 | 0.91 | 0.36    |
| 85 | 6987.9  | 5746.9  | 0.991 | 0.005 | 3.458 | 0.896 | 26.25 | 0.93 | 28.86 | 1.61 | 0.61    |
| 87 | 7427.6  | 5034.5  | 0.990 | 0.005 | 2.940 | 0.644 | 25.94 | 0.82 | 28.86 | 1.26 | 0.62    |
| 88 | 5105.7  | 4484.9  | 0.989 | 0.007 | 2.703 | 0.873 | 28.50 | 0.98 | 32.60 | 1.83 | 0.14    |
| 89 | 7854.6  | 5046.2  | 0.973 | 0.012 | 2.397 | 0.455 | 24.76 | 1.00 | 27.94 | 1.79 | 0.048   |
| 90 | 3089.3  | 3869.4  | 0.995 | 0.004 | 2.938 | 1.247 | 22.75 | 0.87 | 26.01 | 1.35 | 0.0033  |
| 92 | 317.5   | 296.6   | 0.995 | 0.003 | 1.467 | 0.802 | 22.98 | 0.38 | 27.41 | 0.42 | 0.00037 |
| 94 | 9881.9  | 6312.0  | 0.978 | 0.011 | 2.315 | 0.606 | 15.68 | 0.69 | 18.48 | 1.25 | 3.8E-5  |
| 95 | 12051.4 | 17365.9 | 0.985 | 0.016 | 1.487 | 0.748 | 14.76 | 0.35 | 18.24 | 0.81 | 0.7     |
| 96 | 19823.3 | 6376.3  | 0.989 | 0.005 | 2.496 | 0.575 | 14.39 | 0.25 | 17.42 | 0.53 | 1.0     |
| 97 | 23617.5 | 2238.4  | 0.976 | 0.028 | 0.311 | 0.085 | 12.89 | 0.09 | 16.03 | 0.20 | 0.99    |
| 99 | 23389.2 | 9550.5  | 0.991 | 0.006 | 1.531 | 0.484 | 11.12 | 0.20 | 14.39 | 0.41 | 1.0     |



|     |        |        |       |       |       |       |       |      |       |      |        |
|-----|--------|--------|-------|-------|-------|-------|-------|------|-------|------|--------|
| 100 | 3107.7 | 4390.3 | 0.988 | 0.012 | 1.065 | 0.709 | 11.52 | 0.43 | 16.26 | 0.87 | 7.0E-5 |
| 101 | 457.0  | 3501.1 | 0.996 | 0.008 | 0.718 | 0.458 | 11.69 | 0.29 | 16.30 | 0.47 | 0.022  |
